1 **Hepatic fibrosis induced zinc-deficient dermatosis in American alligators (*Alligator***  
2 ***mississippiensis*)**

3

4 Ilaria M. Piras<sup>1</sup>, Annemarie Bezuidenhout<sup>2</sup>, Josué Díaz-Delgado<sup>3</sup>, Deirdre Slawski<sup>2</sup> and  
5 Pamela A. Kelly<sup>1</sup>

6

7 <sup>1</sup>School of Veterinary Medicine, University College Dublin, Belfield, Dublin, Ireland

8 <sup>2</sup>Padenga Ltd, 121 Borrowdale Road, Gunhill, Harare, Zimbabwe.

9 <sup>3</sup>Texas A&M Veterinary Medical Diagnostic Laboratory, College Station, USA

10

11

12 Corresponding author: Pamela Kelly, School of Veterinary Medicine, University College

13 Dublin, Belfield, Dublin, Ireland; phone number 00353 (0)1 7166154, [Pamela.Kelly@ucd.ie](mailto:Pamela.Kelly@ucd.ie)

14

15

16

17

18

19

20

21

22

23

24

25

26 **Abstract**

27 Crocodilian farming generates strong economic incentives for the conservation of several  
28 species previously endangered by intensive hunting. Ranching farms, in particular, are  
29 intimately connected to the natural crocodilian habitat and have a significant impact on  
30 wetland preservation. The financial sustainability of this industry relies on the production of  
31 first grade skins for the luxury leather market. Only flawless skins are considered of first  
32 grade by the stringent standards of the market, and even a single defect represents an  
33 economical loss. “Double scale” is one such defect that drastically reduces the appeal of  
34 crocodilian skin. Although double scale defects represent a threat to the economical  
35 sustainability of the farming industry, there is no scientific literature available on this topic.  
36 This study, carried out in a ranching farm of American alligators (*Alligator mississippiensis*),  
37 represents the first investigation into the pathogenesis of double scale. Our results indicate  
38 that double scale is a keratinization disorder associated with zinc deficiency. Furthermore, we  
39 found that portal hypertension due to liver fibrosis, underlies zinc deficiency in cases of  
40 double scale. Lastly, we found that chronic vitamin A toxicity can cause liver fibrosis in  
41 crocodilians. For the first time, we demonstrate a causal association between liver disease and  
42 skin quality in a crocodilian species. This study reveals the conserved role of zinc in the  
43 homeostasis of reptilian skin. Also, we show that, like mammals, reptiles may develop liver  
44 fibrosis following chronic vitamin A toxicity and through activation of hepatic stellate cells.  
45 Our results advance herpetological medicine and will translate into improved captive  
46 crocodilian welfare and husbandry.

47

48

49 **Keywords:** American alligator, *Alligator mississippiensis*, double scale, hepatic fibrosis,  
50 portal hypertension, vitamin A, zinc deficiency

51

## 52 **Introduction**

53           After decades of unregulated and intensive hunting for skin exploitation, most  
54 crocodilian species became endangered, and some were almost extirpated by the beginning of  
55 1970s<sup>1</sup>. This dramatic decline of wild crocodilian populations induced several countries to  
56 protect crocodilians through legislation. In addition, the worldwide trade of wild species and  
57 their products became regulated by the Convention on International Trade in Endangered  
58 Species (CITES) from 1975. Crocodile farming gained momentum in this historical context  
59 as a valuable opportunity to provide skins for an ever-growing leather market and, at the  
60 same time, incentivize the conservation of crocodilians<sup>2,3</sup>.

61           Ranching is the most common way of farming American alligators (*Alligator*  
62 *mississippiensis*), in the United States. Ranching farms are intimately connected to the natural  
63 alligator habitat and have a significant impact in wildlife conservation. This way of  
64 production is based on the collection of wild eggs, followed by regular reintroduction of  
65 juveniles and hatchlings born on farm, to maintain the wild crocodile population<sup>4</sup>. This  
66 practice incentivize the preservation of the wet land habitats, saves eggs that are often subject  
67 to predation or destruction in wild conditions<sup>5</sup> and boosts hatchlings survive until  
68 adulthood<sup>5,6,7,8</sup>.

69           The main focus of crocodile farming is to produce high quality skins to supply the  
70 expanding demand for premium hides for the luxury leather market<sup>7</sup>. For this reason, care is  
71 taken during rearing to minimize damage to the belly skin, which is the most valuable part of  
72 the hide, either from abrasive surfaces, from interactions with other crocodiles, and from any  
73 dermatologic conditions that can produce a defect<sup>4,9,10</sup>.

74           This study is a clinical and pathological investigation conducted on a ranching farm of  
75 American alligators following a year of poor skin gradings due to high incidence of “double

76 scale” (DS) defects in the population. This skin condition reduces leather quality and has an  
77 important impact on the financial sustainability of the industry. The manifestations of this  
78 condition remain uncharacterized, and the etiology is unclear. Multifactorial causes,  
79 involving potential nutritional, metabolic and genetic factors have been considered  
80 anecdotally, but none have been explored in the scientific literature so far.

81

## 82 **Results and discussion**

### 83 **Double scale is a disorder of keratinization**

84 The skin is a protective barrier composed of multiple layers of specialized epithelial  
85 cells called keratinocytes, that offer protection against pathogen invasion, chemical, thermal,  
86 and physical damage, and prevent body water loss. All these functions are provided by the  
87 outermost layer of the epidermis composed of terminally differentiated keratinocytes, the  
88 corneocytes. The constant balance of keratinocyte proliferation, differentiation and shedding  
89 of corneocytes facilitates repair after external trauma and maintains the steady state of the  
90 corneal layer<sup>11</sup>. Scales are skin appendages evolved by reptiles<sup>12</sup>, which exquisite  
91 arrangement pattern has made crocodilian leather one of the most demanded products of the  
92 luxury fashion market since 1800<sup>1,13</sup>.

93 DS defect undermines the appeal of the belly scale pattern with an array of defects. In  
94 this study, DS presented as a combination of focal extensive pitting and roughening of the  
95 cranial and medial edge of the belly scale (18/18 -100%), which was often accompanied by a  
96 brown discoloration (Figure 1A). In the most severe cases, a linear, ring-shaped dent carving  
97 the central portion of the scale was also present (7/18-38.8%) (Fig. 1A, arrow). The presence  
98 of this dent is responsible for the duplicated appearance of the scale, from which this defect  
99 derives its name.

100

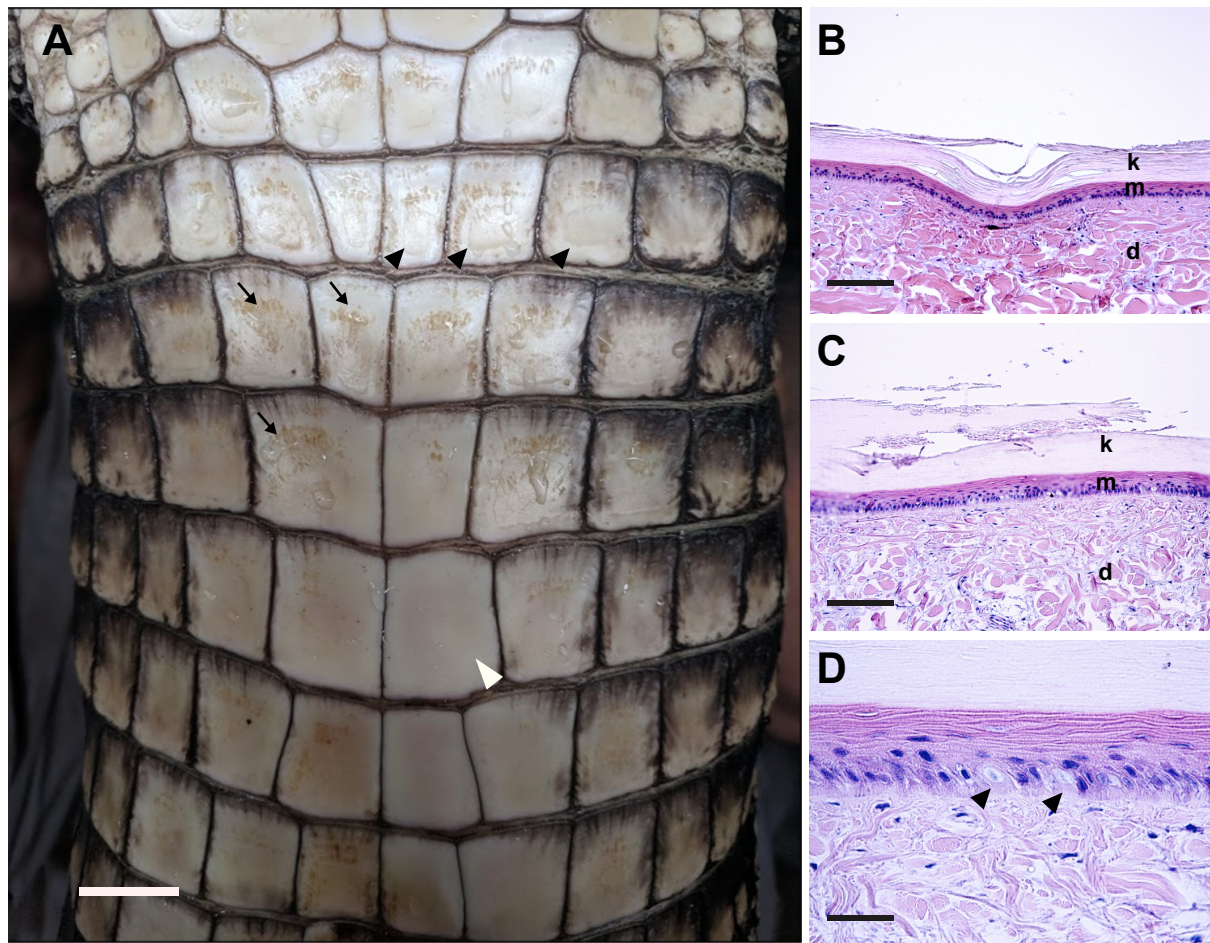

101

102 **Figure 1. Belly skin with double scale defect, American alligator.** Gross appearance of double  
103 scale defect (A) characterized by a rough and pitted surface (arrows) often associated with a linear  
104 dent (black arrowheads). Note the smooth and even surface of the normal scale (white arrowhead).  
105 Scale bar 1 cm. Microphotographs of a cross section of double scale (B-C-D). H&E, scale bar 200um  
106 (B-C), 50um (D). The grossly noticeable dent is histologically characterized by a focal depression of  
107 the epidermis and the dermis (B). At the gross level of the rough surface, histologically the corneal  
108 layer is disrupted and fragmented (C). Higher magnification of the epidermis shows frequent  
109 degeneration of the basal keratinocytes (arrowheads) (D). (k) corneal layer and (m) Malpighian layer  
110 of the epidermis, (d) dermis.

111

112 Histologically, this dent presented as a depression of the epidermis and superficial dermis  
113 (Figure 1B) giving the scale an irregular profile that resulted in downgrading of the processed  
114 skin (data not shown). DS also presented loss of the characteristic compactness of the

115 reptilian  $\beta$ -keratinized corneal layer, with frequent multifocal fragmentation (Figure 1C) that  
116 corresponded grossly to the roughened pitted areas of the scale. Other changes evident at  
117 histological examination were increased numbers of degenerating basal keratinocytes with a  
118 mean of 3.7 per 10,000 cells, (SD=9.3, n19) (Figure 1D) compared to 0.21 per 10,000 cells in  
119 normal scales (SD=0.39, n=9).  $\beta$ -keratin layer thickness was 94.6  $\mu\text{m}$  on average in normal  
120 scales (SD=11.6, n= 18) (figure 2A, 2B and 2G), which is consistent with measurements  
121 reported in the literature for juvenile alligators of similar age<sup>14</sup>. The  $\alpha$ -keratin, measured at  
122 the level of the hinge, was 18.8  $\mu\text{m}$  on average (SD=5.3, n=18) (Figure 2C and H). A marked  
123 thickening of the keratin layer without retained nuclei, or orthokeratotic hyperkeratosis  
124 (Figure 2), characterized all DS samples examined (18/18-100%) compared to normal scales  
125 (n=9) (Figure 2A and 2B). This hyperkeratosis affected both, the  $\beta$ -keratin layering of the  
126 scale plate (corneal layer, mean= 168.5 $\mu\text{m}$ ; SD=35.4, n=36, *p* value <0.0001) (Figure 2D and  
127 G), and the  $\alpha$ -keratin in the hinge area (mean= 70.5  $\mu\text{m}$ ; SD=21.5, n= 36 *p* value <0.0001)  
128 (Figure 2E and 2H). The thickness of the live strata of the epidermis, including the basal,  
129 supra-basal and transitional layers (also referred to as Malpighian layer), was significantly  
130 reduced in scales with hyperkeratosis (average of 33.1  $\mu\text{m}$ , SD=9.9  $\mu\text{m}$ , n=36, *p* value  
131 <0.0001) compared to normal scales (mean 51, SD=11.9, n18) (Figure 2B, 2D and 2F). In  
132 addition, changes to the dermis were evident. Underlying the epidermis, the dermis is the skin  
133 stroma composed of collagen bundles, ground substance, blood vessels and nerves that  
134 provides innervation, vascularization, and support to the organ.

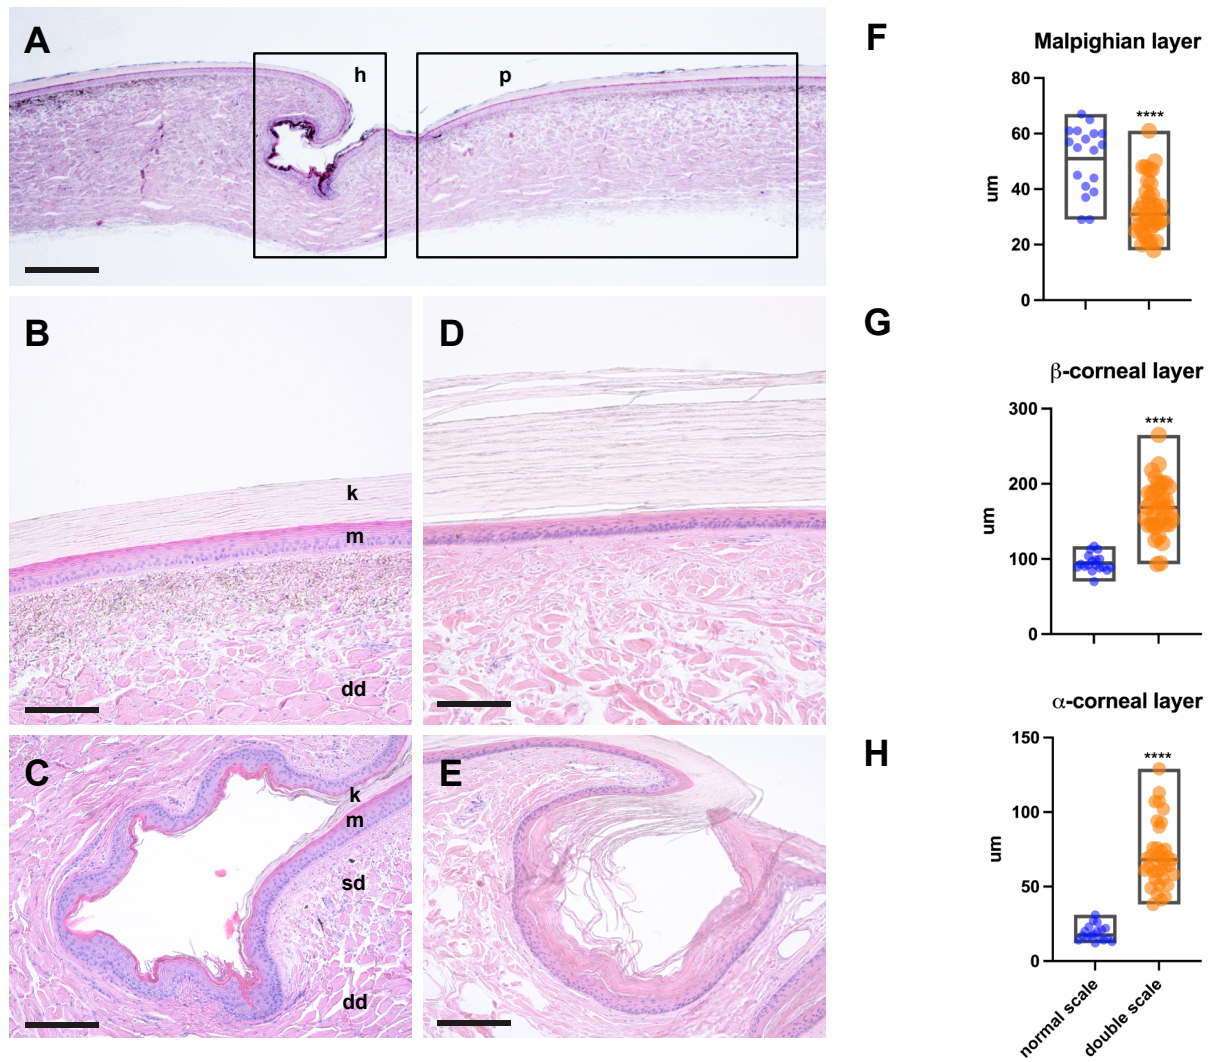

135

136 **Figure 2. Hyperkeratosis characterizes double scale in American alligator.** Microphotographs of

137 a normal scale (A-B-C) and double scale (C-D). H&E. Normal anatomy of alligator scales (A) showing

138 the plate region (p box) constituting most part of the scale and the hinge region (h box) which

139 connects the cranial (left) to the caudal (right) scale. Scale bar 1mm. Compared to normal scale (B

140 and C), the keratin layer of skin affected with double scale is markedly thickened both at the level of

141 the plate (D) and the hinge (E). Note the  $\beta$ -keratin covering the plate of the scale stains negatively (B

142 and D) whilst the  $\alpha$ -keratin at the level of the hinge dyes pink with eosin (C and E). The live strata of

143 the epidermis, also called Malpighian layer, is instead thinner (E). Scale bar  $200\mu\text{m}$ . (k) Corneal layer,

144 (m) Malpighian layer of the epidermis, (sd) superficial dermis, and (dd) deep dermis. The box graphs

145 show measurements of Malpighian layer (F) beta (G) and alpha (H) corneal layers of normal (n=18

146 measurements) and double scales (n=38 measurements). Central line in the box indicates mean.

147 Difference of means calculated with Student *t* test was significant with *p* value <0.0001 (\*\*\*\*).

148 A disarray in the orientation of collagen fibers was evident in the superficial and deep  
149 dermis of several DS individuals (9/19; 47%), accompanied by a multifocal increase of the  
150 ground substance (Figure 3). Disarray and loss of collagen fibers could be considered  
151 responsible for the altered staining properties noted in processed alligator skin with DS defect  
152 (data not shown).  
153

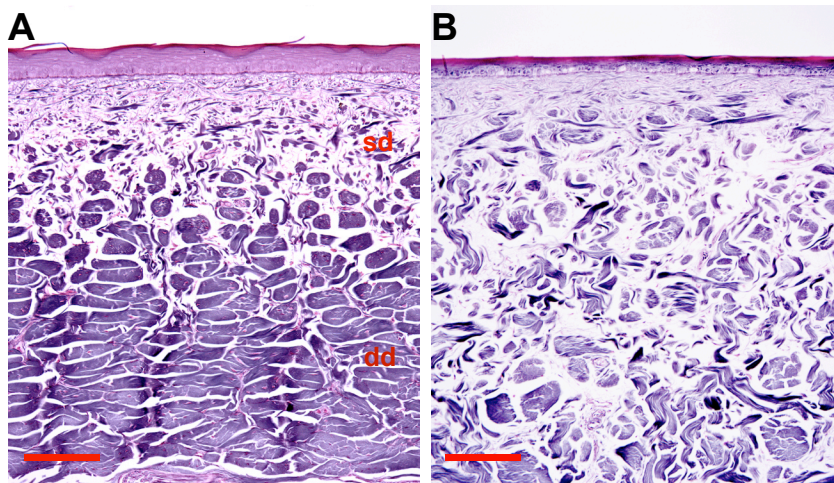

154  
155 **Figure 3. Dermal collagen disarray characterizes the skin with double scale.** Microphotographs  
156 of a normal scale (A) and double scale (B). Reticulin Stain. Scale bar 200 $\mu$ m. Normal anatomy of  
157 alligator dermis (A) showing an orderly arrangement of collagen bundles (stained black) that became  
158 larger in the deep dermis. Note that all bundles are oriented perpendicular to the cut section the  
159 separation between superficial and deep dermis is well-defined. In double scales (B) collagen bundles  
160 are reduced in size and are separated by an increase of clear spaces (ground matter). The bundles  
161 are arranged haphazardly and a clear definition between superficial and deep dermis is lost.

162

### 163 **There is a correlation between skin lesions and liver injury**

164 A further, systematic histopathological examination of intestine, lung, heart, brain,  
165 spleen, liver, and kidneys from 86 alligators revealed a high incidence of liver disease (47/86;  
166 54%); 70% of pathologic livers (33/47) presented fibrosis with variable severity (Figure 4A  
167 and Supplementary Figure 1). Most interestingly, liver fibrosis was always present in



168 alligators with DS (18/18; 100%). No other related histopathological findings were observed  
169 in other tissues. There is still little information available on normal liver histology of reptiles,  
170 and to the best of our knowledge, liver fibrosis has not been described in alligators. Hepatic  
171 fibrosis represents a scarring response to chronic liver injury after a variety of insults<sup>15</sup>. The  
172 most advanced stage of fibrosis, called cirrhosis, defines the distortion of the liver  
173 parenchyma with bridging scars and nodule formation, accompanied by altered blood flow<sup>15</sup>.  
174 In the alligator livers examined, fibrosis formed within and around periportal tracts and the  
175 liver capsule. In the most severe cases, fibrosis bridged several portal areas resulting in  
176 complete loss of normal lobular architecture with evidence of nodular regeneration, as  
177 described in cirrhosis of mammalian species (Figure 4C). Other liver changes consistently  
178 associated to fibrosis in alligators were bile duct proliferation (Figure 4A), which is  
179 considered a nonspecific reaction to liver injury described in humans and several domestic  
180 species,<sup>16</sup> glycogen accumulation (figure 4E), causing hepatocytes vacuolation and swelling  
181 and increase of periportal melanomacrophage numbers (Figure 4A). Except for the expected  
182 accumulation prior to hibernation, glycogen accumulation is largely considered a  
183 consequence of hepatocytes metabolic pathways disturbance<sup>17</sup>. An increase of melanin laden  
184 macrophages (melanomacrophages) suggests an enhanced phagocytic activity in reptilians<sup>18</sup>  
185 and is likely due to an increased rate of cell debris clearance, resulting from hepatocyte loss  
186 in these cases. Myofibroblasts are considered the main source of collagen production in liver  
187 fibrosis in humans, mice, and dogs<sup>19,20</sup>. They are fibroblast-like cells that express  $\alpha$ -smooth  
188 muscle actin which confers them contractile properties<sup>19,17</sup>. As expected, immunolabelling of  
189 alligator livers showed  $\alpha$ -SMA-positive cell numbers were markedly increased around  
190 periportal areas, where the collagen accumulated (Figure 5A).

191

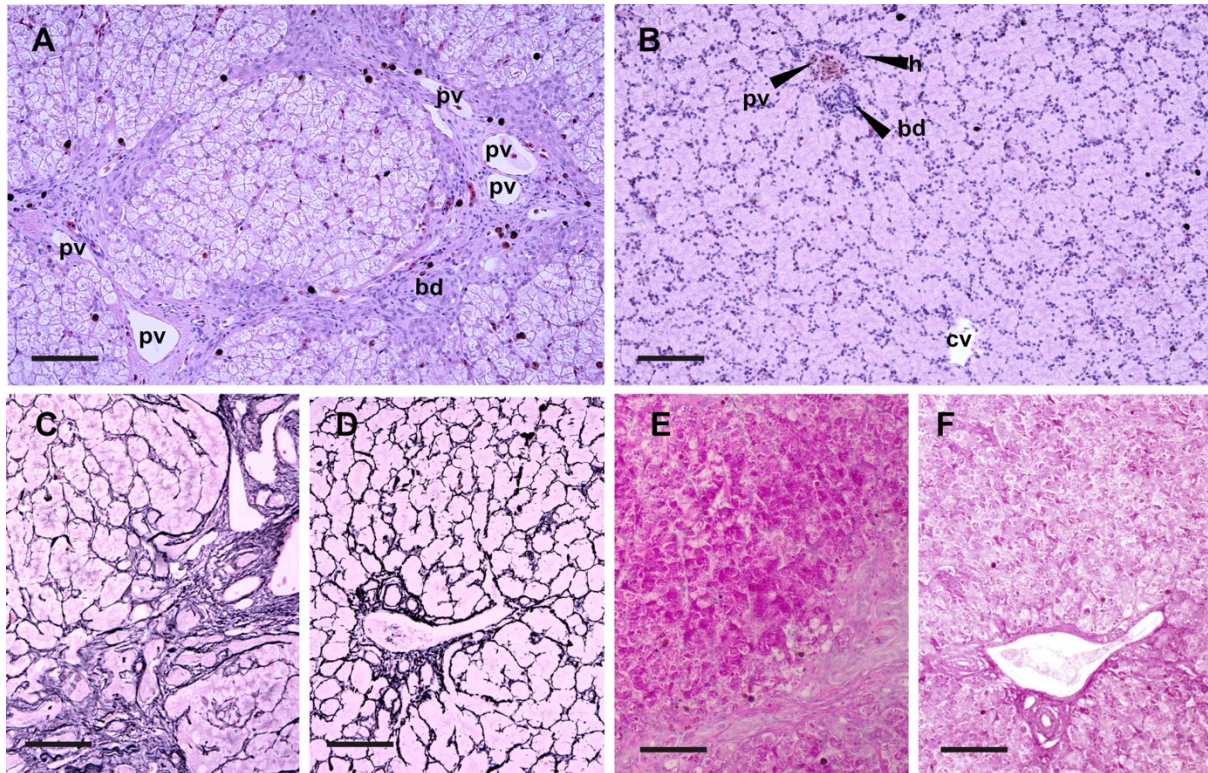

192

193 **Figure 4. Liver fibrosis in American alligators with double scale.** Microphotographs of alligator

194 livers (A-B) H&E. (C-D) Reticulin stain. (E-F) PAS. Scale bar 200 $\mu$ m. Liver affected by severe fibrosis

195 (A) showing bands of collagen fibers bridging between several triads associated with increased

196 numbers of melanin laden macrophages. Biliary ducts are increased in number and are tortuous.

197 Portal veins were tortuous and irregularly dilated, suggestive of shunting. Hepatocytes show diffuse

198 feathery vacuolation and swelling. Central vein is collapsed and undetectable. Normal liver lobule

199 architecture (B) showing a triad (upper left) composed of one portal vein, one hepatic artery and one

200 biliary duct. A central vein (lower right) is seen at the center of the lobule. Reticulin stain accentuates

201 the nodular deformation of the lobule and distortion of hepatocellular plates and nodular deformation

202 of hepatic parenchyma (c) in cirrhotic liver compared to a normal one (D). Periodic acid Schiff stain

203 highlights glycogen accumulation is causing hepatocyte vacuolation of livers with fibrosis (E)

204 compared with normal livers (F). Biliary ducts (bd), portal vein (pv) and (h) hepatic artery and (cv)

205 central vein.

206

207 Myofibroblasts in livers can be recruited by activation of hepatic stellate cells (or Ito cells),

208 liver resident fibroblasts (portal or centrilobular), epithelial cells that undergo epithelial-to-

209 mesenchymal transition, bone marrow-derived fibrocytes, and smooth muscle cells that  
210 surround blood vessels<sup>21</sup>. Comparison of  $\alpha$ -SMA and desmin immunolabelling with normal  
211 alligator livers indicated hepatic fibrogenic cells derived from proliferation of periportal and  
212 perivascular fibroblasts but also recruitment of desmin positive cells from the sinusoids,  
213 which are most likely hepatic stellate cells (Figure 5 and 6).  
214

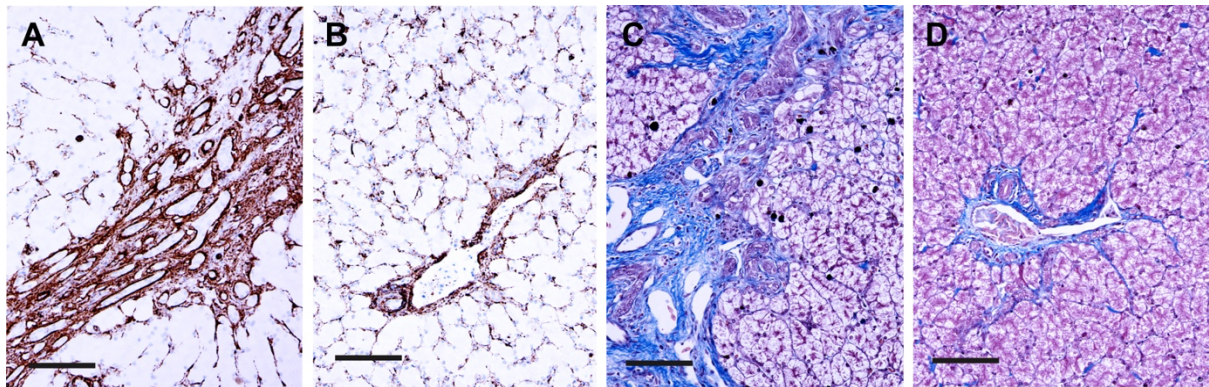

215  
216 **Figure 5. Myofibroblasts are the fibrogenic cells in American alligator's livers.**  
217 Microphotographs of alligator livers. (A-B) Anti- $\alpha$ -smooth muscle (SMA) immunohistochemistry. (C-D)  
218 Masson's Trichrome. Scale bar 200 $\mu$ m. In livers with fibrosis  $\alpha$ -SMA-positive myofibroblasts increase  
219 within periportal areas (A) in association with collagen deposition (blue stain, C). Note the numbers of  
220 myofibroblasts in the perisinusoidal spaces are reduced compared to normal livers (B). Collagen  
221 distribution in normal livers (D).  
222

### 223 **Vitamin A toxicity underlies liver injury**

224 Progressive liver fibrosis can be caused by chronic viral infection, prolonged use of  
225 hepatotoxic drugs, longstanding exposure to aflatoxin, iron, and copper accumulation,  
226 chronic biliary cholangitis, autoimmune hepatitis, and chronic vitamin A toxicity among  
227 others<sup>19,22,23</sup>. Alcohol abuse, non-alcoholic fatty liver disease, non-alcoholic steatohepatitis  
228 are largely reported in humans<sup>16</sup>.  
229

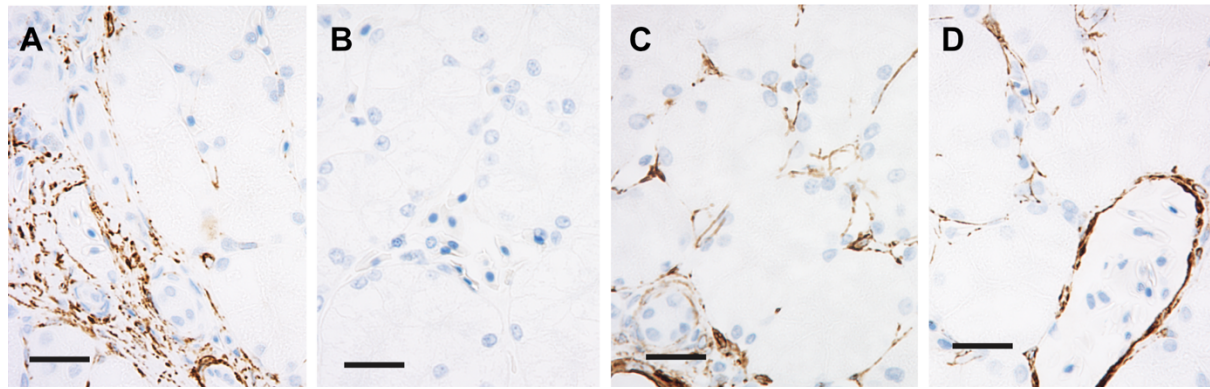

230

231 **Figure 6. Migration of desmin-positive cells from perisinusoidal spaces to periportal areas in**  
232 **association to liver fibrosis in American alligator.** Microphotographs of alligator livers. Anti-desmin  
233 immunohistochemistry. Scale bars 50 $\mu$ m. When fibrosis is present immunolabelled cells are  
234 concentrated in the periportal areas (A), leaving the sinusoids depleted of desmin-positive cells in the  
235 midzonal and centrilobular areas (B). In normal livers, desmin-positive cells have cytoplasmatic  
236 processes that diffusely and evenly stretch into the perisinusoidal spaces in both periportal (C) and  
237 centrilobular areas (D).

238

239 Results from hepatic vitamin and mineral level analysis (table 1) indicated the average  
240 concentration of vitamin A in alligator livers with fibrosis was 880,000 mg/100g (n= 27).  
241 This value is significantly higher than vitamin A concentration found in normal alligator  
242 livers (389,000 mg/100g; n=22) examined in this study. In our alligators, hypervitaminosis A  
243 resulted from a longstanding diet with vitamin A concentration ranging from 23,300 IU/Kg to  
244 38,200 IU/Kg. The tolerable range of dietary vitamin A levels for crocodylians is currently  
245 unknown. Vitamin mix supplementation is generally used in excess in commercial  
246 crocodylian diets as no toxicities have been reported in the literature, so far<sup>24</sup>. The maximum  
247 tolerable dose of dietary vitamin A for chicken broiler breeders appears to be 35,000 IU/kg,  
248 corresponding to 195.2 mg/100 g of retinyl esters in the liver whilst higher supplementation  
249 has been shown to impair liver function<sup>25</sup>. Compared to chickens and turkeys, which are the  
250 closest phylogenetically related domestic species, it seems that alligators have a much higher  
251 capacity to accumulate vitamin A in the liver<sup>25,26</sup>. Considering that 70% of alligators fed with

252 vitamin A concentration above 23,300 IU/Kg developed liver fibrosis, we suggest these  
253 levels may be toxic. Liver damage related to chronic hypervitaminosis A is a rare, but well  
254 described condition in humans<sup>27</sup> and has only been reported once in a cat<sup>28</sup>. Although  
255 occasionally suspected in pet reptiles, it has not been characterized<sup>29</sup>. The pathologic changes  
256 in the liver are related to the increased retinyl storage in the organ and may result in portal  
257 hypertension, secondary to sinusoidal compression, and hyperplasia of Ito cells followed by  
258 fibrosis<sup>16,30</sup>. Toxicological studies are warranted to confirm the toxic ranges of vitamin A in  
259 crocodilians.

260         Hepatic iron levels were also increased in alligator livers with fibrosis (Table 1).  
261 Histologically, iron increase and pattern of accumulation occurred exclusively within  
262 periportal macrophages (Supplementary figure 2). The mesenchymal pattern of iron  
263 accumulation together with the lack of stainable iron in hepatocytes and other tissues  
264 indicates the origin of iron loading is secondary to hepatocyte loss rather than chronic,  
265 augmented intake<sup>31</sup>. Other causes of liver disease leading to fibrosis such as copper loading,  
266 aflatoxin and CCl<sub>4</sub> exposure were excluded based on the result of liver oligoelements analysis  
267 and toxicologic test of feed and water. As histological evidence of cholangiohepatitis and  
268 bacterial infection were absent in the livers examined, they were discarded as possible  
269 underlying causes of liver disease.

270

### 271 **Zinc deficiency due to portal hypertension is the cause of skin lesions**

272         Mineral and vitamin analysis of the serum and livers revealed an imbalance between  
273 hepatic accumulation and systemic distribution of several elements in alligators with liver  
274 fibrosis (Table 1). Specifically, vitamin E, copper and zinc were significantly decreased in  
275 peripheral blood, although their hepatic concentration remained steady in the liver or, like

276 zinc, slightly increased (Table 1). These imbalances suggested portal hypertension had  
 277 developed in these individuals, which is supported by histopathological observations of  
 278 sinusoidal compression, myofibroblast hyperplasia, sinusoidal and periportal fibrosis. All  
 279 these changes in alligator livers, most likely contributed to increased intrahepatic blood flow  
 280 resistance, impairing the systemic availability of nutrients absorbed by the gut and delivered  
 281 to the liver through the portal vein.

282

283

284

285

|                   | Controls |       | Liver Fibrosis |                |       |       |                |       |
|-------------------|----------|-------|----------------|----------------|-------|-------|----------------|-------|
|                   | Liver    | Serum | Liver          | <i>p</i> value | Trend | Serum | <i>p</i> value | Trend |
| <b>vitamin A</b>  | 389      |       | 880            | ****           | ↑     |       |                |       |
| <b>Palmate</b>    | 362      |       | 855            | ****           | ↑     |       |                |       |
| <b>retinol</b>    | 28       |       | 41             |                |       |       |                |       |
| <b>Iron</b>       | 388      | 136   | 734            | ****           | ↑     | 182   |                |       |
| <b>Zinc</b>       | 81       | 1     | 96             | *              | ↑     | 0.6   | ****           | ↓     |
| <b>Copper</b>     | 39       | 0.67  | 57             |                |       | 0.55  | *              | ↓     |
| <b>Selenium</b>   | 2.9      | 324   | 3.3            | *              | ↑     | 353   |                |       |
| <b>Manganese</b>  | 5.4      | 8     | 3.4            | ****           | ↓     | 10    |                |       |
| <b>Molybdenum</b> | 0.29     | 19    | 0.13           | ****           | ↓     | 22    |                |       |
| <b>Cobalt</b>     | 0.02     | 0.2   | 0.02           |                |       | 0.7   |                |       |
| <b>Arsenic</b>    | 0.09     | 0.017 | 0.1            |                |       | 0.025 | **             | ↑     |
| <b>Cadmium</b>    | 0.02     | 0.1   | 0.02           |                |       | 0.1   |                |       |
| <b>Thallium</b>   | 0.02     | 0.1   | 0.02           |                |       | 0.1   |                |       |
| <b>Lead</b>       | 0.046    | 0.1   | 0.023          |                |       | 0.1   |                |       |
| <b>Vitamin E</b>  | 69       | 4.9   | 57             |                |       | 3.4   | **             | ↓     |

286 **Table 1. Micronutrient concentration in liver and serum of alligators with liver fibrosis**

287 **compared to alligators with normal livers.** Micronutrients in the liver and serum are indicated as

288 mean value in  $\mu\text{g/g}$  and  $\mu\text{g/mL}$  respectively. Means are calculated on 22 samples from animals with

289 normal livers and 28 with liver fibrosis. Difference of means was calculated with Student *t* test.

290 Significant results with *p* value <0.0001 are marked as \*\*\*\*, *p* value 0.0021 as \*\*, and *p* value <0.05

291 as\*.

292

293 The venous shunting seen in histological sections as tortuous and irregularly dilated portal  
294 veins in livers with fibrosis (Figure 4A, asterisk) is an attempt to correct the circulatory  
295 disturbances present in the organ and is consistently present in human livers with portal  
296 hypertension<sup>32</sup>.

297         Of all serum micronutrient imbalances in alligators, zinc reduction was the most  
298 striking for its severity (0.6 ug/mL; n= 20) compared to controls (mean 1µg/mL; n= 22)  
299 (Figure 7D). These results are highly suggestive of zinc deficiency as a primary cause of  
300 alligator skin lesions, specifically DS. Zinc deficiency is a common finding in people  
301 suffering of liver cirrhosis and is due to portal hypertension or decreased serum levels of  
302 albumin<sup>33</sup>. In this case albumin serum levels of alligators with liver disease were comparable  
303 to the controls (1.77 and 1.8 g/dL, respectively). Cutaneous lesions are common  
304 manifestations of zinc deficiency both in humans and in animals, but the pathogenic  
305 mechanisms are unclear<sup>34</sup>. Zinc in the skin is regulated by transporters (ZnTs and ZIPs) and  
306 metallothioneins (MTs) which regulate epidermal proliferation and differentiation. MTs are  
307 cysteine-rich, zinc-binding proteins synthesized in response to tissue zinc levels and  
308 essentially control its availability<sup>35</sup>. MTs also act as free radical scavengers<sup>36</sup>. Several authors  
309 suggest that zinc antioxidant effects explain its inhibitory effect on apoptotic pathways,  
310 which is considered a key aspect of the pathology of zinc-deficient skin<sup>37</sup>.

311         MTs expression may be used for subjective determination of zinc concentration in  
312 skin samples<sup>34</sup>. Anti-metallothionein immunolabelling of alligator skin revealed a drastic  
313 reduction of MTs in alligators with liver fibrosis, confirming zinc deficiency is a primary  
314 underlying cause of skin lesions in these animals (Figure 7).

315

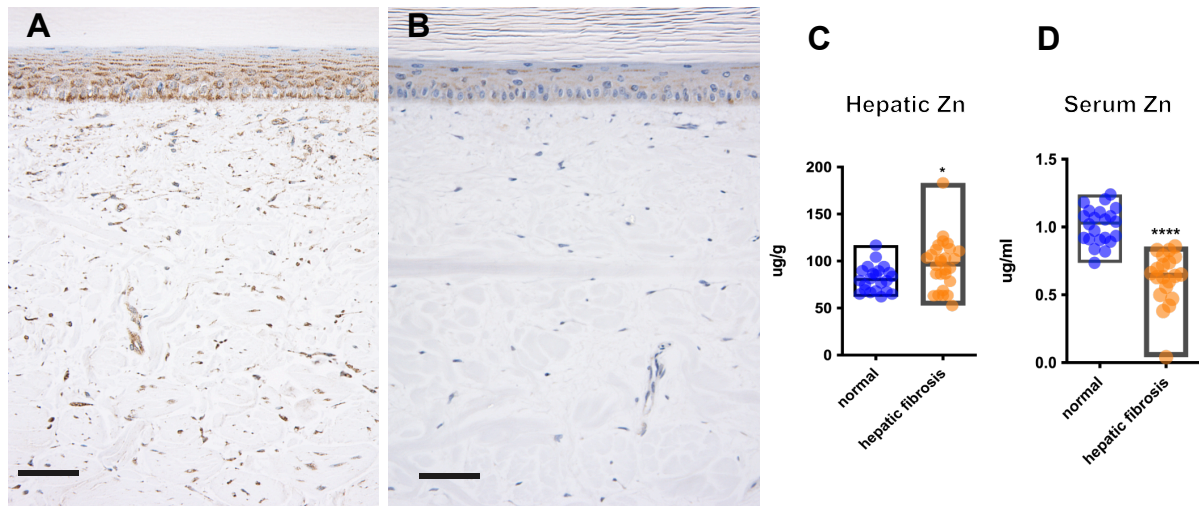

316

317 **Figure 7. Zinc deficiency and metallothionein depletion in the epidermis of alligators with liver**

318 **fibrosis.** (A-B) Microphotographs of belly scale. Anti-metallothionein immunohistochemistry, scale bar

319 50 $\mu$ m. Metallothionein is labelled (granular cytoplasmic pattern) diffusely in all layers of the live

320 epidermis and dermal fibroblasts in normal scales (A). Very scant metallothionein immunolabeling is

321 detectable in the epidermis and dermis of animals with double scale (B). Box graphs show levels of

322 hepatic (C) and serum (D) zinc in alligators with liver fibrosis (n=28) compared to alligators with

323 normal livers (n=22). Central line in the box indicates mean. Difference of means calculated with

324 Student *t* test. Significant differences are indicated with \*\*\*\* for with *p* value <0.0001 and \* for *p* value

325 <0.05.

326

327 The presence of increased numbers of degenerated basal keratinocytes in the skin samples

328 examined seem to support the presence of an increased oxidative stress in the epidermis of

329 alligators. Interestingly, the histopathology of zinc-deficient dermatosis in alligators seems to

330 differ from humans and domestic animals. In mammalian species the characteristic

331 thickening of the corneal layer is accompanied by the retention of nuclei in corneocytes

332 (parakeratosis) and the layers of live strata of the epidermis are also increased (hyperplasia or

333 acanthosis)<sup>34</sup>. These morphological differences are likely due to the different mechanism of

334 keratinization in crocodylian skin, where terminally differentiated keratinocytes produce  $\beta$ -

335 keratin, which is exclusive of reptilian and avian appendages and is responsible for the



336 rigidity of scales and feathers. Another important difference concerns keratohyalin granules,  
337 which are essential in mammalian keratinization process and absent in crocodilian  
338 keratinocytes. Consistent to all species with zinc-deficient dermatosis, is the severe  
339 thickening of the corneal layer which is considered secondary to disorders of proliferation,  
340 differentiation, and exfoliation of the epidermis<sup>34</sup>, although the precise pathogenesis remains  
341 unknown. Regarding the collagen disarray present in the dermis of scales with DS defect, we  
342 suggest an altered function of zinc-dependent matrix metalloproteinases could be involved.  
343 Matrix metalloproteinases belong to a family of endopeptidases involved in the cleavage of  
344 extracellular matrix proteins, required for tissue remodeling and wound healing<sup>38</sup>. We  
345 hypothesize that a lack of tissue remodeling capability would cause the collagen disarray in  
346 alligator skin with zinc deficiency. Further research is warranted to assess this hypothesis.

347

#### 348 **Conclusions**

349 This study reveals how liver disease can affect skin quality in farmed alligators, highlighting  
350 the importance of animal health and welfare for the economical sustainability of crocodilian  
351 farming. Double scale is considered anecdotally as a multifactorial skin condition; here we  
352 demonstrate how zinc deficiency due to hepatic portal hypertension plays a main role. This  
353 finding indicates a conserved role of zinc in reptilian skin homeostasis, suggesting that  
354 acquired nutritional and metabolic disturbances can lead to skin disease in this species. There  
355 is limited knowledge on nutritional needs of captive crocodilians and literature lacks  
356 reference ranges. The liver disease in this case was likely due to chronic vitamin A toxicity.  
357 Based on histopathological examination of livers, we suggest dietary concentrations of  
358 vitamin A higher than 23,000 IU/kg are potentially hepatotoxic, whilst an average of 15,000  
359 IU/kg seem to be safe for captive alligators.

360

361 **Methods:**

362 **Ethic statement**

363 This study was ethic review exempt (AREC-E-22-20-KELLY) as it involves samples  
364 collected exclusively during normal husbandry or veterinary clinical procedures. No  
365 procedures were carried out on live animals and no animal was euthanized for the sole  
366 purpose of this study.

367 **Animals**

368 All alligators included in this study were reared on the same farm. At the time of  
369 investigation, the farm produced over 12,000 animals per annum on a single site. Animals  
370 were housed in groups of 20 to 80 depending on their size. These groups consisted of a mix  
371 of both male and female alligators. The houses were insulated and were divided into pools  
372 and feeding and basking decks. Diet consisted of a commercially available complete  
373 crocodylian pelleted feed purchased from a single manufacturer that was tested routinely for  
374 mycotoxins.

375 **Sample Collection**

376 Between April 2019 and June 2020, during routine abattoir procedures, samples of  
377 liver, lung, kidney, heart, spleen, intestine, brain, and serum were collected from 86 randomly  
378 selected alligators (Supplemental table 1). From the same animals we collected 18 samples of  
379 belly skin with double scale and 9 samples of normal belly skin (Supplemental table 1). Age  
380 range for selected animals was between 9 and 19 months; sex and farming pen of origin were  
381 mixed. The average length and belly width for each age group of alligator at harvest is  
382 presented in Supplemental table 2.

383 **Histopathology**

384 Following fixation in 10% neutral buffered formalin, tissues were processed and then  
385 embedded in paraffin-wax, sectioned at 4  $\mu$ m, and stained with hematoxylin and eosin

386 (H&E). Histological sections were assessed for the presence of histopathological changes by  
387 pathologists P.A.K (ECVP board certified), J.D.D. (ACVP board certified) and I.M.P.  
388 (anatomic pathology resident).

389 3 representative samples of liver with fibrosis and 3 with normal histology were stained with  
390 Masson trichrome, Gordon and Sweet's reticulin, Perls' Prussian blue stains to highlight  
391 collagen, reticular fibers and iron respectively. To characterize the vacuolar hepatopathy  
392 further, Periodic acid Schiff (PAS) staining was also carried out on these samples.

393 The histopathological examination of skin was based on 61 scales with defects  
394 sampled from 18 alligators and 32 normal scales sampled from 9 individuals, for a total of 93  
395 scales. Skin measurements were carried out on 18 normal and 36 scales with DS (2 scales per  
396 alligator) using imageJ on microphotographs of 20x magnification with scale set to 15  $\mu\text{m}$   
397 equivalent to alligator erythrocyte wide diameter.

398 Six representative samples of skin, three normal and three with DS defect, were also stained  
399 with Gordon and Sweet's reticulin, Masson trichrome, PAS, Gram and used for  
400 immunohistochemical labelling.

#### 401 **Immunohistochemistry**

402 Fibrogenic cells were assessed by immunohistochemistry (IHC) on six samples of  
403 liver, three with fibrosis and three normal, using an anti-desmin antibody at concentration of  
404 1/25 (a-desmin clone D33, M0760; Denmark A/S) and a monoclonal antibody directed  
405 against the alpha isoform of smooth muscle actin at a working dilution of 1/100 (a-SMA,  
406 clone 1A4, n M0851; Dako, Denmark A/S). Alligator skeletal muscle was used as positive  
407 control for anti-desmin antibody (Supplemental figure 3A). The tunica muscularis of alligator  
408 intestines served as positive control for a-SMA antibody (Supplemental figure 3C).

409 The presence of zinc deficiency was assessed targeting metallothionein using a rabbit  
410 polyclonal anti-metallothionein at 1/400 dilution (ab192385, abcam) on six samples of

411 alligator skin, three with double scale defect and three normal. Mouse skin was used as  
412 positive control for the primary antibody (Supplemental figure 3E). For all antibodies, one  
413 reaction without primary antibody was included as a negative control (Supplemental figure  
414 3B, D and F).

#### 415 **Vitamin A, vitamin E and mineral concentration in liver and serum:**

416 Copper, iron, zinc, manganese, molybdenum, cobalt, arsenic, cadmium, lead,  
417 thallium, selenium, vitamin E, retinol, palmate and total vitamin A concentrations were  
418 determined on 49 of the 86 frozen liver samples by inductively coupled plasma mass  
419 spectrometry (ICP-MS) and chromatography at Texas A&M Veterinary Medical Diagnostic  
420 Laboratories. The same laboratory determined copper, iron, zinc, manganese, molybdenum,  
421 cobalt, arsenic, cadmium, lead, thallium, selenium, vitamin E concentration on 42 samples of  
422 frozen serum. Metals and minerals were all assayed on ICP-MS, each element with its own  
423 standard curve of at least 5 points with correlation coefficient greater than 0.995. Vitamin A,  
424 retinol, palmate and vitamin E were measured by chromatography performed on a Waters  
425 system using a C18 Cosmosil PBr column (4.6x250mm). Detailed protocols for ICP-MS and  
426 chromatography are provided in the supplementary material.

#### 427 **Statistical analysis**

428 Equality of means between the two groups of data was assessed using *t* test and  
429 PRISM 9 was used for statistic calculations and graphs design.

430

#### 431 **References**

432 1 Thorbjarnarson, J. Crocodile Tears and Skins International Trade Economic  
433 Constraints, and limits to the sustainable use of crocodilians *Conservation Biology*  
434 **13**, 465-470 (1999).

- 435 2 Joanen, T., Merchant, M. in *American Alligators: Habitats, behaviors, and threats*  
436 (ed Eversole and S. Henke) 349–374. (Nova Science Publications, 2018).
- 437 3 Thorbjarnarson, J. *Crocodiles : an action plan for their conservation*. (IUNC, 1992).  
438 4 IUCN-SSC Crocodile Specialist Group. *Farming and the Crocodile Industry*,  
439 <<http://www.iucncsg.org/pages/Farming-and-the-Crocodile-Industry.html>> (2021).
- 440 5 Temsiripong, Y., Woodward A. R., Ross, J. P., Kubilis, P.S., and Percival, H. F.  
441 Survival and Growth of American Alligator (*Alligator mississippiensis*) Hatchlings  
442 after Artificial Incubation and Repatriation. *Journal of Herpetology* **40**, 415-423  
443 (2006).
- 444 6 Brien, M. L., Webb, G. J., McGuinness, K. & Christian, K. A. The relationship  
445 between early growth and survival of hatchling saltwater crocodiles (*Crocodylus*  
446 *porosus*) in captivity. *PLoS One* **9** (2014).
- 447 7 Gilbert, B. *Studies on skin diseases of crocodiles* PhD thesis, James Cook University,  
448 (2000).
- 449 8 Kushlan J.A., and Mazzotti F.J. Population Biology of the American Crocodile.  
450 *Journal of Herpetology* **23**, 7-21 (1989).
- 451 9 Manolis, S. C., & Webb, G. . *Tracking Crocodile Skin Defects: From Farm to*  
452 *Product*. (RIRDC, 2011).
- 453 10 Gigante, J. M. in *Proceedings of the 18th Working Meeting of the IUCN-SSC*  
454 *Crocodile Specialist Group*. 20-30 (IUNC).
- 455 11. Mauldin, E.A., Peters-Kennedy J. in *Pathology of Domestic Animals* Vol. 1 (ed  
456 Kennedy & Palmer Jubb) (Elsevier, 2016).
- 457 12 Chang, C. *et al.* Reptile scale paradigm: Evo-Devo, pattern formation and  
458 regeneration. *Int J Dev Biol* **53**, 813-826 (2009).

- 459 13 Joanen, T., L. McNease, R. M. Elsey, and M. Staton. in *Harvesting wild species:*  
460 *implications for biodiversity conservation.* (ed C. H. Freese) 349–374 (Johns  
461 Hopkins University Press,, 1997).
- 462 14 Alibardi, L. Histology, ultrastructure, and pigmentation in the horny scales of growing  
463 crocodilians. *Acta Zoologica* **92**, 187-200 (2011).
- 464 15 Jiao, J., Friedman, S. L. & Aloman, C. Hepatic fibrosis. *Curr Opin Gastroenterol* **25**,  
465 223-229 (2009).
- 466 16 van den Ingh, T., Van Winkle, T., Cullen J.M., Charles J. A., Desmet, V. J. in *WSAVA*  
467 *Standards for Clinical and Histological Diagnosis of Canine and Feline Liver*  
468 *Diseases* (ed Rodenhuis J) Ch. 7, (Elsevier Saunders, 2006).
- 469 17 Bernabo, I., Biasone, P., Macirella, R., Tripepi, S. & Brunelli, E. Liver histology and  
470 ultrastructure of the Italian newt (*Lissotriton italicus*): normal structure and  
471 modifications after acute exposure to nonylphenol ethoxylates. *Exp Toxicol Pathol* **66**  
472 (2014).
- 473 18 Steinel, N. C. & Bolnick, D. I. Melanomacrophage Centers As a Histological  
474 Indicator of Immune Function in Fish and Other Poikilotherms. *Front Immunol* **8**, 827  
475 (2017).
- 476 19 Higashi, T., Friedman, S. L. & Hoshida, Y. Hepatic stellate cells as key target in liver  
477 fibrosis. *Adv Drug Deliv Rev* **121**, 27-42 (2017).
- 478 20 Eulenberg, V. M. & Lidbury, J. A. Hepatic Fibrosis in Dogs. *J Vet Intern Med* **32**, 26-  
479 41 (2018).
- 480 21 Gressner, O. A., Rizk, M. S., Kovalenko, E., Weiskirchen, R. & Gressner, A. M.  
481 Changing the pathogenetic roadmap of liver fibrosis? Where did it start; where will it  
482 go? *J Gastroenterol Hepatol* **23**, 1024-1035 (2008).

- 483 22 Van Wettere A. J, and Brown D. L. in *Pathologic basis of Veterinary Disease* (ed  
484 James F. Zackary) Ch. 8, (Elsevier, 2016).
- 485 23 Fox, R., Stace, N., Wood, K. & French, C. Liver toxicity from vitamin A. *JGH Open*  
486 **4**, 287-288 (2020).
- 487 24 Isberg, S. R. Nutrition of juvenile saltwater crocodiles (*Crocodylus porosus*) in  
488 commercial production systems. *CAB Reviews: Perspectives in Agriculture,*  
489 *Veterinary Science, Nutrition and Natural Resources* **2** (2007).
- 490 25 Yuan, J., Roshdy, A. R., Guo, Y., Wang, Y. & Guo, S. Effect of dietary vitamin A on  
491 reproductive performance and immune response of broiler breeders. *PLoS One* **9**,  
492 e105677 (2014).
- 493 26 Majchrzak, D., Fabian, E. & Elmadfa, I. Vitamin A content (retinol and retinyl esters)  
494 in livers of different animals. *Food Chemistry* **98**, 704-710 (2006).
- 495 27 Nollevaux, M. C. *et al.* Hypervitaminosis A-induced liver fibrosis: stellate cell  
496 activation and daily dose consumption. *Liver Int* **26**, 182-186 (2006).
- 497 28 Guerra, J. M. *et al.* Hypervitaminosis A-induced hepatic fibrosis in a cat. *J Feline*  
498 *Med Surg* **16**, 243-248 (2014).
- 499 29 Stahl, S. J. in *Clinical Veterinary Advisor* (eds Mayer Jörg & M. Donnelly Thomas)  
500 108-110 (W.B. Saunders, 2013).
- 501 30 Shirakami, Y., Lee, S. A., Clugston, R. D. & Blaner, W. S. Hepatic metabolism of  
502 retinoids and disease associations. *Biochim Biophys Acta* **1821**, 124-136 (2012).
- 503 31 Deugnier, Y. & Turlin, B. Pathology of hepatic iron overload. *Semin Liver Dis* **31**,  
504 260-271 (2011).
- 505 32 Roskams T, B. A., Bianchi L, Burt A, Callea F, Denk H, De Groote J, Desmet V,  
506 Hubscher S, Ishak K, MacSween R, Portmann B, Poulson H, Scheuer P, Terracciano

- 507 L & Thaler H. Histopathology of portal hypertension a practical guideline.  
508 *Histopathology* **42**, 2-13 (2003).
- 509 33 Grungreiff, K., Reinhold, D. & Wedemeyer, H. The role of zinc in liver cirrhosis. *Ann*  
510 *Hepatol* **15**, 7-16 (2016).
- 511 34 Romanucci, M. *et al.* Oxidative stress in the pathogenesis of canine zinc-responsive  
512 dermatosis. *Vet Dermatol* **22**, 31-38 (2011).
- 513 35 Ogawa, Y., Kinoshita, M., Shimada, S. & Kawamura, T. Zinc and Skin Disorders.  
514 *Nutrients* **10** (2018).
- 515 36 Schwartz, J. R., Marsh, R. G. & Draelos, Z. D. Zinc and skin health: overview of  
516 physiology and pharmacology. *Dermatol Surg* **31**, 837-847; discussion 847 (2005).
- 517 37 Wilson, D., Varigos, G. & Ackland, M. L. Apoptosis may underlie the pathology of  
518 zinc-deficient skin. *Immunol Cell Biol* **84**, 28-37 (2006).
- 519 38 de Almeida, L. G. N. *et al.* Matrix Metalloproteinases: From Molecular Mechanisms  
520 to Physiology, Pathophysiology, and Pharmacology. *Pharmacol Rev* **74**, 712-768  
521 (2022).

522

## 523 **Acknowledgements**

524 The authors would like to thank Lynn Stevenson and Frazer Bell, Diagnostic Services,  
525 MVLS, School of Veterinary Medicine, University of Glasgow; Marcus Reddell,  
526 Tallowcreek Ranch, Texas; Susan Peters and Brian Cloak, University College Dublin, School  
527 of Veterinary Medicine for their technical support. The authors also wish to thank Dr  
528 Catherine Barr, Maritza Anguiano, Texas Veterinary Medical Diagnostic Laboratory and Dr  
529 Peter O'Brien, University College Dublin, School of Veterinary Medicine for their  
530 contributions to the clinical investigation. We also wish to thank Prof. Lorenzo Alibardi,



531 Dipartimento di Scienze Biologiche, Geologiche e Ambientali Università di Bologna, for his  
532 support on the development of immunohistochemical protocols.

### 533 **Author contributions**

534 P.A.K. and D.S. and A.B. conceived the study. P.A.K and I.M.P designed the study with the  
535 support of D.S and A.B. P.A.K., I.M.P and J.D.D carried out the histopathological  
536 examination and interpretation of tissue samples. A.B. and D.S. examined the alligators on  
537 farm, collected samples, contributed photos and data from the animals included in this study.  
538 I.M.P. analyzed the data with the support of D.S and A.B. I.M.P. wrote the manuscript. J.D.D  
539 and P.A.K contributed to the writing and revised the manuscript. All authors reviewed the  
540 manuscript and consented to its submission and publication.

### 541 **Declaration of Conflicting Interests**

542 The authors declared no potential conflicts of interest with respect to the research, authorship,  
543 and/or publication of this article.

544

545

546

547

548

549

550
